# Supplementary material for: Factors Associated with the Implementation of Non-Pharmaceutical Interventions for Reducing Coronavirus Disease 2019 (COVID-19): A Systematic Review
Source: MDPI journal article supplement (doi:10.3390/ijerph18084274), 2021-04-17
Supplement: s1 [file s1]

### File S1: JBI critical appraisal tools

JBI critical appraisal tools for the cross-sectional survey [63], qualitative [64], cohort [63] and case-control [63] studies were used to appraise the retrieved studies with respect to the possibility of biases in their designs, conduct and analysis. The results are provided in Table 1, with number 1-8 (for cross-sectional), 1-10 (for qualitative research), 1-11 (for cohort study) and 1-10 (case-control study) representing satisfactory fulfilment of the corresponding criteria.

#### *Cross-sectional surveys*

- 1) Were the criteria for inclusion in the sample clearly defined?
- 2) Were the study subjects and the setting described in detail?
- 3) Was the exposure measured in a valid and reliable way?
- 4) Were objective, standard criteria used for measurement of the condition?
- 5) Were confounding factors identified?
- 6) Were strategies to deal with confounding factors stated?
- 7) Were the outcomes measured in a valid and reliable way?
- 8) Was appropriate statistical analysis used?

#### *Qualitative studies*

- 1) Is there congruity between the stated philosophical perspective and the research methodology?
- 2) Is there congruity between the research methodology and the research question or objectives?
- 3) Is there congruity between the research methodology and the methods used to collect data?
- 4) Is there congruity between the research methodology and the representation and analysis of data?
- 5) Is there congruity between the research methodology and the interpretation of results?
- 6) Is there a statement locating the researcher culturally or theoretically?
- 7) Is the influence of the researcher on the research, and vice-versa, addressed?
- 8) Are participants, and their voices, adequately represented?
- 9) Is the research ethical according to current criteria, for recent studies, and is there evidence of ethical approval by an appropriate body?
- 10) Do the conclusions drawn in the research report flow from the analysis, or interpretation, of the data?

#### *Cohort studies*

- 1) Were the two groups similar and recruited from the same population?
- 2) Were the exposures measured similarly to assign people to both exposed and unexposed groups?
- 3) Was the exposure measured in a valid and reliable way?
- 4) Were confounding factors identified?
- 5) Were strategies to deal with confounding factors stated?
- 6) Were the groups/participants free of the outcome at the start of the study (or at the moment of exposure)?
- 7) Were the outcomes measured in a valid and reliable way?
- 8) Was the follow up time reported and sufficient to be long enough for outcomes to occur?
- 9) Was follow up complete, and if not, were the reasons to loss to follow up described and explored?
- 10) Were strategies to address incomplete follow up utilized?
- 11) Was appropriate statistical analysis used?

#### *Case-control studies*

- 1) Were the groups comparable other than the presence of disease in cases or the absence of disease in controls?
- 2) Were cases and controls matched appropriately?
- 3) Were the same criteria used for identification of cases and controls?
- 4) Was exposure measured in a standard, valid and reliable way?
- 5) Was exposure measured in the same way for cases and controls?
- 6) Were confounding factors identified?
- 7) Were strategies to deal with confounding factors stated?
- 8) Were outcomes assessed in a standard, valid and reliable way for cases and controls?
- 9) Was the exposure period of interest long enough to be meaningful?
- 10) Was appropriate statistical analysis used?
