# Supplementary material for: Factors Associated with the Implementation of Non-Pharmaceutical Interventions for Reducing Coronavirus Disease 2019 (COVID-19): A Systematic Review
Source: MDPI journal article supplement (doi:10.3390/ijerph18084274), 2021-04-17
Supplement: s1 [file s1]

**Table S1:** The contribution of each study in a thematic synthesis

[illegible]

|                                                                                                                     |   |  |   |  |   |   |  |  |   |   |  |  |   |   |   |   |  |
|---------------------------------------------------------------------------------------------------------------------|---|--|---|--|---|---|--|--|---|---|--|--|---|---|---|---|--|
| ▪ Media affecting mental wellbeing and adding to the level of anxiety                                               |   |  |   |  | √ |   |  |  |   |   |  |  |   |   | √ |   |  |
| ▪ Fear and anxiety                                                                                                  |   |  |   |  | √ |   |  |  |   | √ |  |  |   |   |   |   |  |
| ▪ Increased quarantine associated with post-traumatic stress disorder and depression; decrease of physical activity |   |  |   |  |   |   |  |  | √ | √ |  |  |   | √ | √ | √ |  |
| ▪ Loss of social interaction and loss of self-worth                                                                 |   |  |   |  | √ |   |  |  |   |   |  |  |   |   |   |   |  |
| ▪ Lack of social and physical contact.                                                                              |   |  |   |  |   | √ |  |  |   |   |  |  |   |   |   |   |  |
| ▪ Lost job or income and relying on parental, familial or state financial support                                   |   |  |   |  |   |   |  |  |   |   |  |  |   |   |   |   |  |
| ▪ COVID-19 associated with ethnic populations in lower socio-economic groups                                        | √ |  | √ |  |   | √ |  |  |   |   |  |  | √ |   | √ | √ |  |
| ▪ Co-morbidity exposure risks and older age ie over 70                                                              | √ |  |   |  |   |   |  |  |   |   |  |  | √ |   |   | √ |  |

**Table S1.** The contribution of each study in a thematic synthesis (cont.)

|                                                                                                                                        | Smith et al. [82] | Jing et al. [83] | Islam et al. [84] | Makhashvili et al. [85] | Bäuerle et al. [86] | Skoda et al. [87] | Williams et al. [88] | Mohamed et al. [89] | Singh et al. [90] | Wang et al. [91] | Wolf et al. [92] | Zhong et al. [93] | Gallè et al. [94] | Geldsetzer [95] | Katz et al. [96] | Meier et al. [97] |
|----------------------------------------------------------------------------------------------------------------------------------------|-------------------|------------------|-------------------|-------------------------|---------------------|-------------------|----------------------|---------------------|-------------------|------------------|------------------|-------------------|-------------------|-----------------|------------------|-------------------|
| ▪ Avoiding crowds and social events                                                                                                    |                   |                  |                   |                         | √                   |                   | √                    | √                   | √                 | √                |                  | √                 | √                 |                 | √                | √                 |
| ▪ Reducing reproduction number to avert a local epidemic                                                                               |                   | √                |                   |                         |                     |                   |                      |                     |                   |                  |                  |                   |                   |                 |                  |                   |
| ▪ Flatten the peak of and area under the epidemic curve                                                                                |                   |                  |                   |                         |                     |                   |                      |                     |                   |                  |                  |                   |                   |                 |                  |                   |
| ▪ Improve the capacity and capabilities of the healthcare system                                                                       |                   | √                |                   |                         |                     |                   |                      |                     | √                 |                  | √                |                   |                   |                 | √                |                   |
| ▪ Appropriate use of physical measures, e.g. hand sanitizers, handwash and face masks                                                  |                   |                  | √                 |                         | √                   |                   |                      |                     | √                 | √                |                  |                   |                   |                 |                  | √                 |
| ▪ Border restrictions, school and border closures to suppress transmission                                                             |                   |                  |                   |                         |                     |                   |                      |                     | √                 |                  |                  |                   |                   |                 |                  |                   |
| ▪ Using multifaceted public health interventions (including border entry restrictions, quarantine and isolation of cases and contacts) | √                 | √                |                   |                         | √                   |                   |                      |                     | √                 |                  | √                |                   |                   | √               |                  | √                 |
| ▪ Changing population behaviour, such as social distancing and personal protective measures                                            | √                 | √                |                   |                         |                     |                   |                      |                     | √                 |                  |                  |                   |                   |                 |                  |                   |
| ▪ Maintain personal hygienic measures                                                                                                  |                   |                  | √                 |                         |                     |                   |                      |                     | √                 |                  |                  |                   |                   |                 |                  | √                 |
| ▪ Compliance with the government actions                                                                                               |                   |                  |                   |                         |                     |                   |                      |                     | √                 |                  |                  |                   | √                 |                 |                  |                   |
| ▪ Behavioural changes or interventions which are less disruptive than total lockdown                                                   |                   |                  |                   |                         |                     |                   |                      |                     |                   |                  |                  | √                 | √                 |                 |                  |                   |
| ▪ About the current and second waves or outbreaks                                                                                      |                   |                  |                   |                         |                     |                   | √                    |                     |                   |                  |                  |                   |                   |                 |                  | √                 |
| ▪ Uncertainty about the duration of the measures                                                                                       |                   |                  |                   |                         |                     |                   | √                    |                     | √                 |                  |                  |                   |                   |                 |                  |                   |
| ▪ Lack of trust in governments                                                                                                         | √                 |                  |                   |                         | √                   |                   | √                    |                     | √                 |                  |                  |                   |                   |                 |                  |                   |
| ▪ Lack of clarity and understanding                                                                                                    |                   |                  | √                 |                         |                     |                   |                      |                     |                   |                  |                  |                   |                   |                 |                  | √                 |
| ▪ Not receiving the support expected                                                                                                   |                   |                  |                   |                         |                     |                   |                      |                     |                   |                  |                  |                   |                   |                 |                  | √                 |
| ▪ Guidance on social distancing and isolation are vague                                                                                |                   |                  |                   |                         |                     |                   |                      |                     |                   |                  |                  |                   |                   |                 |                  |                   |
| ▪ Media constantly giving or reporting wrong information about the pandemic status – resulting in emotional exhaustion                 | √                 |                  |                   |                         |                     |                   |                      |                     |                   |                  |                  |                   | √                 |                 |                  |                   |
| ▪ Worried after seeing posts about COVID-19 pandemic on various social media platforms                                                 |                   |                  |                   |                         |                     |                   |                      |                     | √                 |                  |                  |                   |                   |                 |                  |                   |

|                                                                                                                     |   |  |   |   |   |   |   |  |   |   |   |  |   |   |  |  |
|---------------------------------------------------------------------------------------------------------------------|---|--|---|---|---|---|---|--|---|---|---|--|---|---|--|--|
| ▪ Media affecting mental wellbeing and adding to the level of anxiety                                               |   |  |   |   |   |   |   |  | √ |   |   |  |   |   |  |  |
| ▪ Fear and anxiety                                                                                                  | √ |  |   | √ | √ | √ |   |  | √ | √ |   |  |   |   |  |  |
| ▪ Increased quarantine associated with post-traumatic stress disorder and depression; decrease of physical activity | √ |  | √ |   | √ | √ |   |  |   |   |   |  | √ |   |  |  |
| ▪ Loss of social interaction and loss of self-worth                                                                 |   |  |   |   |   |   | √ |  |   |   |   |  |   |   |  |  |
| ▪ Lack of social and physical contact.                                                                              |   |  |   |   |   | √ | √ |  |   |   |   |  |   |   |  |  |
| ▪ Lost job or income and relying on parental, familial or state financial support                                   |   |  |   |   |   |   |   |  |   |   |   |  |   |   |  |  |
| ▪ COVID-19 associated with ethnic populations in lower socio-economic groups                                        |   |  |   | √ | √ |   | √ |  | √ |   | √ |  |   | √ |  |  |
| ▪ Co-morbidity exposure risks and older age ie over 70                                                              |   |  |   |   |   |   |   |  |   |   | √ |  |   |   |  |  |

Note: Shading indicates a study was rated as having low quality in terms of the methodological details
